# Supplementary material for: Adherence to Prescribed Acamprosate<sup>®</sup> in Alcohol Dependence and 1-Year Morbidities and Mortality: Utilizing a Data Linkage Methodology
Source: Preprints.org preprint supplement (doi:10.20944/preprints202103.0759.v1), 2021-03-31
Supplement: Supplementary file 1 [file supplementary]

**Supplementary Table 1. Descriptive statistics of biochemistry at the baseline when**

**Acamprosate® was initiated**

| **Predictor** | **Reference range** | **Mean (SD)** | ***p*-value** |
| --- | --- | --- | --- |
| *ALT* | F: ≤ 34 IU/L  M: ≤ 45 IU/L | 45 (2.9)  57 (3.4) | 0.125 |
| *AST* | F: 6-34 IU/L  M: 8-40 IU/L | 48 (1.2)  57 (3.5) | 0.634 |
| *GGT* | F: 5-55 IU/L  M: 15-85 IU/L | 78 (6.5)  97 (2.4) | 0.769 |

ALT=ALanine aminotransferase; AST=ASpartate aminotransferase; γGT=Gamma-Glutamyl Transferase; SD= Standard Deviation; *p*= <0.05

**Supplementary Table 2. Characteristics of individuals who died within 1 year of starting Acamprosate®.**

|  | **Total number and**  **characteristics of individuals**  **prescribed Acamprosate®** | **Individuals prescribed**  **Acamprosate® and died within**  **one year of the study** |
| --- | --- | --- |
| **Number** | 3319 | 252 |
| **Mean Age (SD)** | 48.41 (11.8) | 49.93 (12.1) |
| **Males** | 2047 (61.0%) | 179 (71.0%) |
| **Females** | 1272 (39.0%) | 72 (28.6%) |
| **SIMD**  **1**  **2**  **3**  **4**  **5** | 529 (16.0%)  471 (14.0%)  430 (12.6%)  374 (10.6%)  237 (8.0%)  1176 (35.5%) | 88 (34.9%)  65 (25.8%)  41 (16.3%)  23 (11.6%)  28 (6.0%) |
| **Adherence**  **Low**  **Good** | 2732 (87.0%)  587 (13.0%) | 217 (86.2%)  35 (13.8%) |
| **Alcohol**  **Direct**  **Not Direct** | 198 (31.0%)  323 (69.0%) | 101 (40.8%)  151 (59.2%) |

SD= Standard Deviation; SUIMD= Scottish Index of Multiple Deprivation

**Supplementary Table 3. Multivariate association between covariates and all cause**

**mortality.**

| **Predictor** | **HR** | **95% CI** | ***p*-value** |
| --- | --- | --- | --- |
| *Age* | 1.15 | 1.05-1.27 | ***<0.001*** |
| *Sex*  M  F | 0.082  0.104 | 0.013-0.53  0.02-0.67 | 0.001  0.027  0.046 |
| *SIMD* | 1.125 | 1.02-1.24 | <0.05 |
| *Low Adherence* | 1.2 | 1.03-1.4 | ***<0.001*** |
| *Due to Alcohol* | 0.99 | 0.86-1.2 | 0.957 |
| *Number of other*  *medications*  *0*  *1-2*  *3-5*  *6+* | 1.0  0.75  0.56  0.44 | 0.46-1.23  0.22-1.22  0.16-1.18 | n.s.  n.s.  n.s. |

n.s.= not significant; M=Male; F=Female; SIMD= Scottish Index of Multiple Deprivation

HR=Hazard Ratio; CI= Confidence Interval
